# Supplementary material for: Assessing Patient Use of and Attitudes toward eHealth Services for Communication with Primary Care Centers in Saudi Arabia and Factors Affecting Usage
Source: MDPI journal article supplement (doi:10.3390/healthcare12191929), 2024-09-26
Supplement: s1 [file s1]

**1. What is your gender?**

- ☐ Male
- ☐ Female

**2. What is your age in years?**

..... years old

**3. What is your highest level of education?**

- ☐ High School or less
- ☐ Some Post-Secondary Education or Bachelor's Degree
- ☐ Master's Degree or Ph.D or equivalent

**4. How much is your experience with using internet?**

- ☐ <=1 years
- ☐ 1-3 years
- ☐ >3 years

**A) Actual use**

**1. Have used the following eHealth services at the primary care centers.**

| <b>eHealth services</b>                                                                                                                                       | <b>Yes</b>               | <b>No</b>                | <b>I do not know about this service</b> |
|---------------------------------------------------------------------------------------------------------------------------------------------------------------|--------------------------|--------------------------|-----------------------------------------|
| Making/booking an appointment via app/web                                                                                                                     | <input type="checkbox"/> | <input type="checkbox"/> | <input type="checkbox"/>                |
| Asking a healthcare professional a question via app/web                                                                                                       | <input type="checkbox"/> | <input type="checkbox"/> | <input type="checkbox"/>                |
| Reminder bout appointment via SMS                                                                                                                             | <input type="checkbox"/> | <input type="checkbox"/> | <input type="checkbox"/>                |
| Measuring your vital signs e.g., weight, blood pressure or blood sugar level at home and sending the measurement to your health-care professional via app/web | <input type="checkbox"/> | <input type="checkbox"/> | <input type="checkbox"/>                |
| Prescription refill request via app/web                                                                                                                       | <input type="checkbox"/> | <input type="checkbox"/> | <input type="checkbox"/>                |
| Video consultation via app/ web                                                                                                                               | <input type="checkbox"/> | <input type="checkbox"/> | <input type="checkbox"/>                |
| Access to medical data via app/web                                                                                                                            | <input type="checkbox"/> | <input type="checkbox"/> | <input type="checkbox"/>                |

## **B) Awareness of the availability of eHealth services at the primary care centers**

1. Whether you know if the following eHealth services are available at your primary care center's or not?

|                                                                                                                                                      | Available at Pcs         | Not available at Pcs     | I do not know            |
|------------------------------------------------------------------------------------------------------------------------------------------------------|--------------------------|--------------------------|--------------------------|
| a. Making/booking an appointment                                                                                                                     | <input type="checkbox"/> | <input type="checkbox"/> | <input type="checkbox"/> |
| b. Asking a healthcare professional a question via app/web                                                                                           | <input type="checkbox"/> | <input type="checkbox"/> | <input type="checkbox"/> |
| c. Reminder bout appointment                                                                                                                         | <input type="checkbox"/> | <input type="checkbox"/> | <input type="checkbox"/> |
| d. Measuring your vital signs e.g., weight, blood pressure or blood sugar level at home and sending the measurement to your health-care professional | <input type="checkbox"/> | <input type="checkbox"/> | <input type="checkbox"/> |
| e. Prescription refill request                                                                                                                       | <input type="checkbox"/> | <input type="checkbox"/> | <input type="checkbox"/> |
| f. Video consultation                                                                                                                                | <input type="checkbox"/> | <input type="checkbox"/> | <input type="checkbox"/> |
| g. Access to medical data                                                                                                                            | <input type="checkbox"/> | <input type="checkbox"/> | <input type="checkbox"/> |

## **C) Intention to use**

- 1- Do you think you would use one of the above-mentioned Internet applications in the future if you were offered the opportunity?

|                                                                                                         | Yes, definitely          | Yes, probably            | I don't know yet         | No, probably not         | No, definitely not       |
|---------------------------------------------------------------------------------------------------------|--------------------------|--------------------------|--------------------------|--------------------------|--------------------------|
| a. Making/booking an appointment                                                                        | <input type="checkbox"/> | <input type="checkbox"/> | <input type="checkbox"/> | <input type="checkbox"/> | <input type="checkbox"/> |
| b. Asking a healthcare professional a question via app/web                                              | <input type="checkbox"/> | <input type="checkbox"/> | <input type="checkbox"/> | <input type="checkbox"/> | <input type="checkbox"/> |
| c. Reminder bout appointment                                                                            | <input type="checkbox"/> | <input type="checkbox"/> | <input type="checkbox"/> | <input type="checkbox"/> | <input type="checkbox"/> |
| d. Measuring your vital signs e.g., weight, blood pressure or blood sugar level at home and sending the | <input type="checkbox"/> | <input type="checkbox"/> | <input type="checkbox"/> | <input type="checkbox"/> | <input type="checkbox"/> |

|                                              |                          |                          |                          |                          |                          |
|----------------------------------------------|--------------------------|--------------------------|--------------------------|--------------------------|--------------------------|
| measurement to your health-care professional |                          |                          |                          |                          |                          |
| e. Prescription refill request               | <input type="checkbox"/> | <input type="checkbox"/> | <input type="checkbox"/> | <input type="checkbox"/> | <input type="checkbox"/> |
| f. Video consultation                        | <input type="checkbox"/> | <input type="checkbox"/> | <input type="checkbox"/> | <input type="checkbox"/> | <input type="checkbox"/> |
| g. Access to medical data                    | <input type="checkbox"/> | <input type="checkbox"/> | <input type="checkbox"/> | <input type="checkbox"/> | <input type="checkbox"/> |

2. What do you expect from the following eHealth service if you need additional care in the future? To what extent do you agree with the following statements?

| <b>Booking/Making an online appointment</b>                          | <i><b>Strongly disagree</b></i> | <i><b>Disagree</b></i>   | <i><b>Agree</b></i>      | <i><b>Strongly agree</b></i> | <i><b>I don't know</b></i> |
|----------------------------------------------------------------------|---------------------------------|--------------------------|--------------------------|------------------------------|----------------------------|
| a. Is easy to do                                                     | <input type="checkbox"/>        | <input type="checkbox"/> | <input type="checkbox"/> | <input type="checkbox"/>     | <input type="checkbox"/>   |
| b. Is easy to learn                                                  | <input type="checkbox"/>        | <input type="checkbox"/> | <input type="checkbox"/> | <input type="checkbox"/>     | <input type="checkbox"/>   |
| c. Is reliable                                                       | <input type="checkbox"/>        | <input type="checkbox"/> | <input type="checkbox"/> | <input type="checkbox"/>     | <input type="checkbox"/>   |
| d. Works well                                                        | <input type="checkbox"/>        | <input type="checkbox"/> | <input type="checkbox"/> | <input type="checkbox"/>     | <input type="checkbox"/>   |
| e. Is a pleasant way to interact with health-care professionals      | <input type="checkbox"/>        | <input type="checkbox"/> | <input type="checkbox"/> | <input type="checkbox"/>     | <input type="checkbox"/>   |
| f. Fits easily into my daily routine                                 | <input type="checkbox"/>        | <input type="checkbox"/> | <input type="checkbox"/> | <input type="checkbox"/>     | <input type="checkbox"/>   |
| g. Is something my family or friends would like to do                | <input type="checkbox"/>        | <input type="checkbox"/> | <input type="checkbox"/> | <input type="checkbox"/>     | <input type="checkbox"/>   |
| h. Makes it easier to contact a health-care professional when I want | <input type="checkbox"/>        | <input type="checkbox"/> | <input type="checkbox"/> | <input type="checkbox"/>     | <input type="checkbox"/>   |

3. What do you expect from the following eHealth service if you need additional care in the future? To what extent do you agree with the following statements?

| <b>Asking a healthcare professional a question via app/web</b>  | <i><b>Strongly disagree</b></i> | <i><b>Disagree</b></i>   | <i><b>Agree</b></i>      | <i><b>Strongly agree</b></i> | <i><b>I don't know</b></i> |
|-----------------------------------------------------------------|---------------------------------|--------------------------|--------------------------|------------------------------|----------------------------|
| a. Is easy to do                                                | <input type="checkbox"/>        | <input type="checkbox"/> | <input type="checkbox"/> | <input type="checkbox"/>     | <input type="checkbox"/>   |
| b. Is easy to learn                                             | <input type="checkbox"/>        | <input type="checkbox"/> | <input type="checkbox"/> | <input type="checkbox"/>     | <input type="checkbox"/>   |
| c. Is reliable                                                  | <input type="checkbox"/>        | <input type="checkbox"/> | <input type="checkbox"/> | <input type="checkbox"/>     | <input type="checkbox"/>   |
| d. Works well                                                   | <input type="checkbox"/>        | <input type="checkbox"/> | <input type="checkbox"/> | <input type="checkbox"/>     | <input type="checkbox"/>   |
| e. Is a pleasant way to interact with health-care professionals | <input type="checkbox"/>        | <input type="checkbox"/> | <input type="checkbox"/> | <input type="checkbox"/>     | <input type="checkbox"/>   |
| f. Fits easily into my daily routine                            | <input type="checkbox"/>        | <input type="checkbox"/> | <input type="checkbox"/> | <input type="checkbox"/>     | <input type="checkbox"/>   |

| <b>Asking a healthcare professional a question via app/web</b>       | <i><b>Strongly disagree</b></i> | <i><b>Disagree</b></i>   | <i><b>Agree</b></i>      | <i><b>Strongly agree</b></i> | <i><b>I don't know</b></i> |
|----------------------------------------------------------------------|---------------------------------|--------------------------|--------------------------|------------------------------|----------------------------|
| g. Is something my family or friends would like to do                | <input type="checkbox"/>        | <input type="checkbox"/> | <input type="checkbox"/> | <input type="checkbox"/>     | <input type="checkbox"/>   |
| h. Makes it easier to contact a health-care professional when I want | <input type="checkbox"/>        | <input type="checkbox"/> | <input type="checkbox"/> | <input type="checkbox"/>     | <input type="checkbox"/>   |
